# Supplementary material for: Zero-dimensional plate-shaped copper halide crystals with green-yellow emissions
Source: Royal Society of Chemistry journal article supplement (doi:10.1039/d1ma00061f), 2021-01-01
Supplement: d1ma00061f1.pdf [file d1ma00061f1.pdf]

## Supporting Information

### **Zero-Dimensional Plate-shaped Copper Halide Crystals with Green-yellow Emission**

Feng Liu,<sup>a</sup> Debayan Mondal,<sup>b</sup> Kai Zhang,<sup>c</sup> Ying Zhang,<sup>a</sup> Keke Huang,<sup>a</sup> Dayang Wang,<sup>a</sup>  
Wensheng Yang,<sup>a</sup> Priya Mahadevan,<sup>\*b</sup> and Renguo Xie<sup>\*a</sup>

<sup>a</sup>State Key Laboratory of Inorganic Synthesis and Preparative Chemistry, College of Chemistry Jilin University, Changchun 130012, China, Email: [renguoxie@jlu.edu.cn](mailto:renguoxie@jlu.edu.cn)

<sup>b</sup>Department of Condensed Matter Physics and Material Science, S.N. Bose National Centre for Basic Sciences, Kolkata 700106, India, Email: [priya@bose.res.in](mailto:priya@bose.res.in)

<sup>c</sup> State Key Laboratory of Structural Chemistry, Fujian Institute of Research on the Structure of Matter, Chinese Academy of Sciences, Fuzhou, Fujian 350002, China.

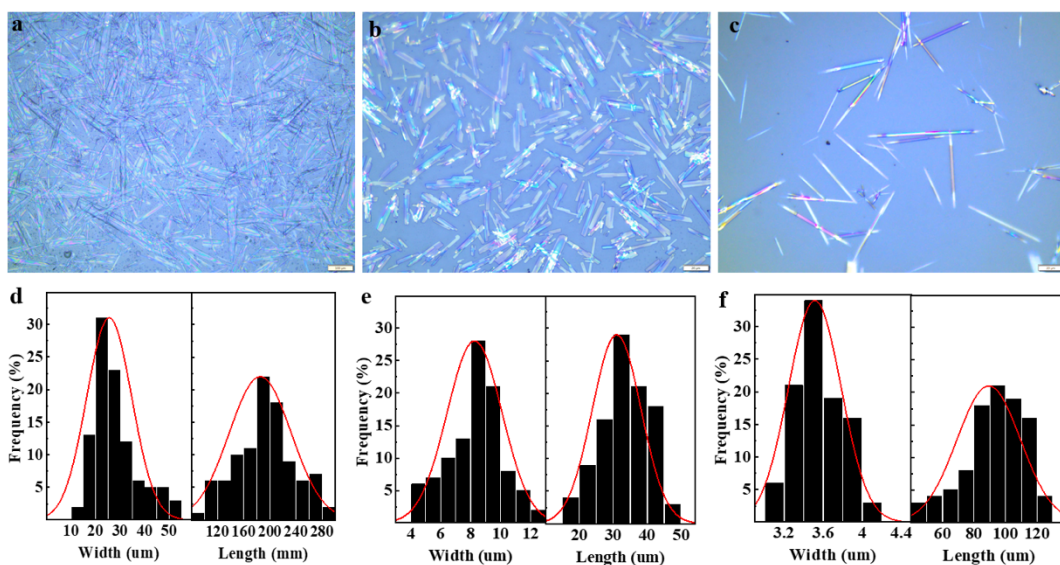

**Figure S1.** (a, b, c) Optical microscope photograph of as prepared micro-plate crystal at reaction concentrations of 0.167/ 0.083/ 0.08 M CuI (a: the scale bar is 100 μm; b, c: the scale bar is 20 μm) and (d, e, f) corresponding to their size distributions of micro-plates.

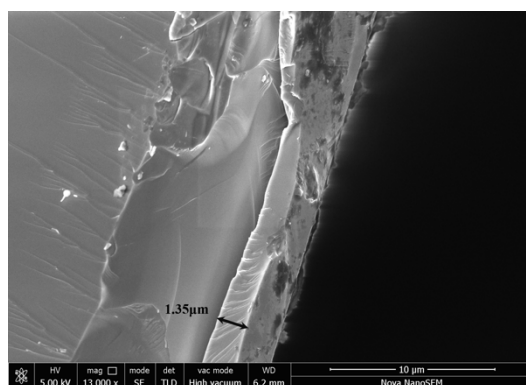

**Figure S2.** The cross-sectional SEM images of a micro-plate. The thickness of micro-sheet was 1.35  $\mu\text{m}$ .

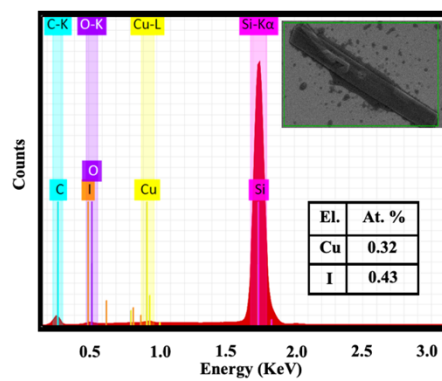

**Figure S3.** Elemental analysis results of the selected micro-plate crystal.

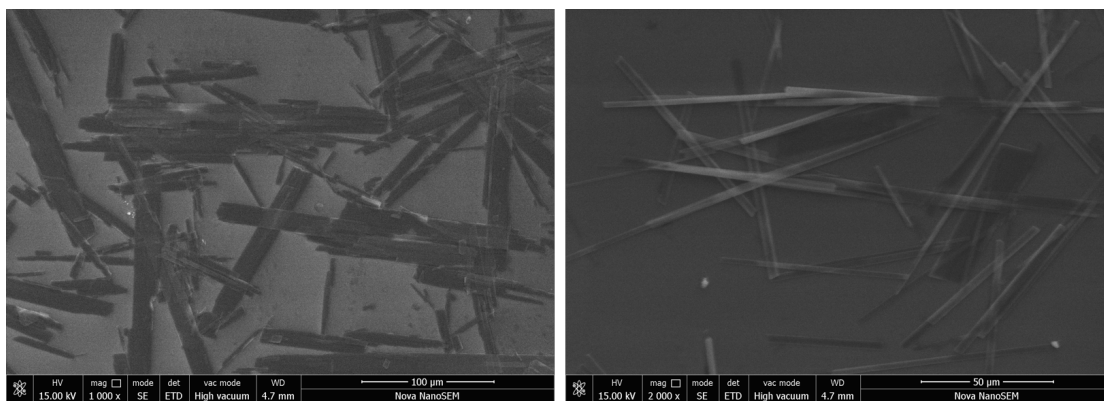

**Figure S4.** The SEM of two samples with different reaction concentrations (0.167M and 0.08 M)

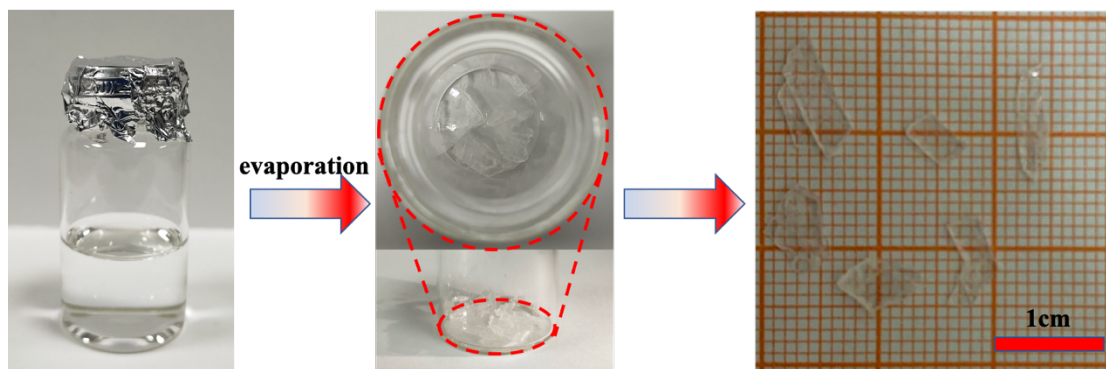

**Figure S5.** Schematic description of crystal growth pathways of  $(\text{DTA})_2\text{Cu}_2\text{Cl}_4$ . The plate-like crystals have sizes on the order of millimeter.

**Table S1.** Crystal data and structure refinement for **(DTA)<sub>2</sub>Cu<sub>2</sub>Cl<sub>4</sub>**

| Compound                               | <b>(DTA)<sub>2</sub>Cu<sub>2</sub>Cl<sub>4</sub></b>                           |
|----------------------------------------|--------------------------------------------------------------------------------|
| Empirical formula                      | C <sub>30</sub> H <sub>68</sub> N <sub>2</sub> Cu <sub>2</sub> Cl <sub>4</sub> |
| Formula weight                         | 1091.56                                                                        |
| Temperature/K                          | 201K                                                                           |
| Crystal system                         | P $\bar{1}$                                                                    |
| a/Å                                    | 8.7798                                                                         |
| b/Å                                    | 10.5044                                                                        |
| c/Å                                    | 22.9998                                                                        |
| $\alpha$                               | 86.9230°                                                                       |
| $\beta$                                | 82.8590°                                                                       |
| $\gamma$                               | 75.8660°                                                                       |
| Volume/Å <sup>3</sup>                  | 2040.42(2)                                                                     |
| Z                                      | 2                                                                              |
| $\rho_{\text{calc}}$ g/cm <sup>3</sup> | 1.777                                                                          |
| $\mu$ /mm <sup>-1</sup>                | 4.088                                                                          |
| F(000)                                 | 1064.0                                                                         |
| Radiation                              | MoK $\alpha$ ( $\lambda$ =0.71073)                                             |
| 2 $\theta$ /°                          | 5.000 to 50.842                                                                |
| Index ranges                           | -10 $\leq$ h $\leq$ 10,-12 $\leq$ k $\leq$ 12,-27 $\leq$ l $\leq$ 27           |
| Independent reflections                | 7551                                                                           |
| Parameters                             | 351                                                                            |
| R1, wR2                                | 0.0153,0.0356                                                                  |
| Goodness-of-fit on F <sup>2</sup>      | 1.050                                                                          |

$$R1 = \sum ||F_o| - |F_c|| / \sum |F_o|. \quad wR2 = [\sum w(F_o^2 - F_c^2)^2 / \sum w(F_o^2)^2]^{1/2}$$

**Table S2.** Selected bond angles (°) for **(DTA)<sub>2</sub>Cu<sub>2</sub>Cl<sub>4</sub>**.

| <b>Bonds</b> | <b>Angle/°</b> |
|--------------|----------------|
| I1 Cu1 I2    | 125.25(2)      |
| I1 Cu1 I3    | 119.76(2)      |
| I2 Cu1 I3    | 114.99(1)      |
| I2 Cu2 I4    | 115.50(1)      |
| I2 Cu2 I3    | 106.68(1)      |
| I4 Cu2 I4#   | 102.69(1)      |
| I3 Cu2 I4    | 117.00(1)      |
| I3 Cu2 I4#   | 109.76(1)      |
| I2 Cu2 I4#   | 105.51(1)      |



**Table S3.** Selected bond distances (Å) for **(DTA)<sub>2</sub>Cu<sub>2</sub>Cl<sub>4</sub>**

| <b>Bonds</b> | <b>bond distances/Å</b> |
|--------------|-------------------------|
| Cu1 I1       | 2.517(5)                |
| Cu1 I2       | 2.554(3)                |
| Cu1 I3       | 2.560(3)                |
| Cu2 I2       | 2.697(6)                |
| Cu2 I3       | 2.680(3)                |
| Cu2 I4       | 2.707(4)                |
| Cu2 I4#      | 2.642(5)                |

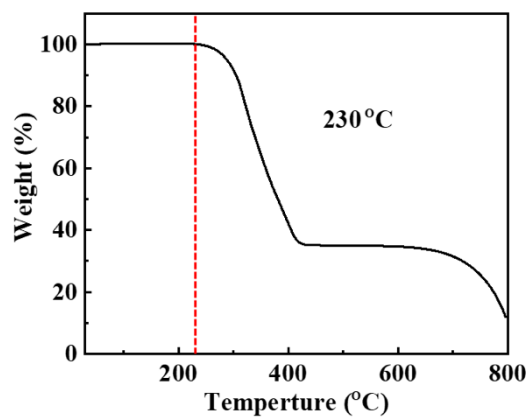

**Figure S6.** Thermogravimetric analysis of (DTA)<sub>2</sub>Cu<sub>2</sub>I<sub>4</sub> crystal powder.

**Table S4.** Calculated attachment energies for different crystal faces of the (DTA)<sub>2</sub>Cu<sub>2</sub>I<sub>4</sub> crystal.

| hkl     | d <sub>hkl</sub> /Å | E <sub>att</sub> (Total)/kcal·mol <sup>-1</sup> | % Total facet area |
|---------|---------------------|-------------------------------------------------|--------------------|
| (0 0 1) | 22.81               | -32.06                                          | 51.38              |
| (0 1 0) | 10.18               | -83.85                                          | 20.50              |
| (1 0 0) | 8.46                | -76.55                                          | 11.81              |

The growth morphology method was applied to investigate the shapes of organic molecular crystals in this study. In general, the growth rate of one crystal face is assumed to be proportional to its attachment energy (E<sub>att</sub>), that is, the face with lower attachment energy is slower growing and hence has more morphological importance.

The attachment energy can be calculated by:

$$E_{att} = E_{lattice} - E_{slice}$$

Where E<sub>lattice</sub> is the lattice energy of the crystal and E<sub>slice</sub> is the energy for a growth slice of thickness d<sub>hkl</sub>, respectively.

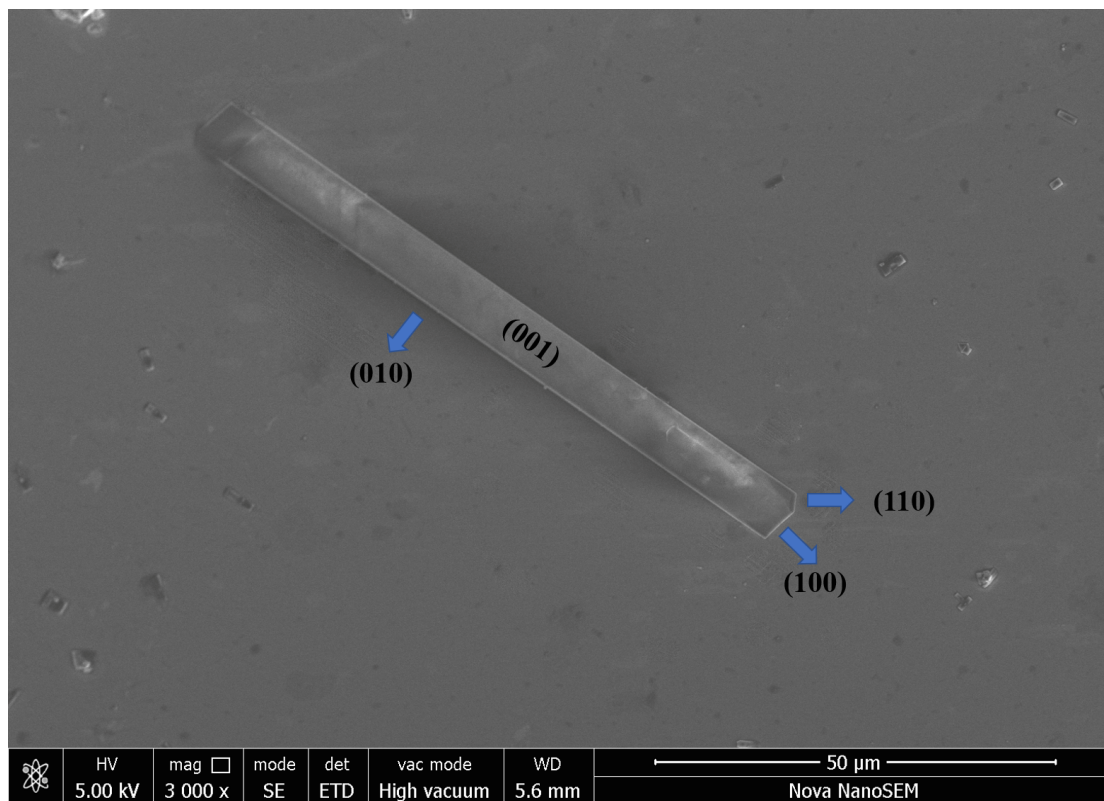

**Figure S7.** The high magnification SEM images of a micro-plate crystal with typical lattice planes.

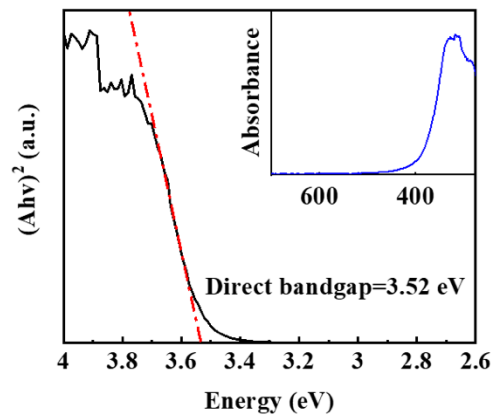

**Figure S8.** Tauc plots and corresponding optical diffuse reflection spectra (inset) of  $(DTA)_2Cu_2I_4$ .

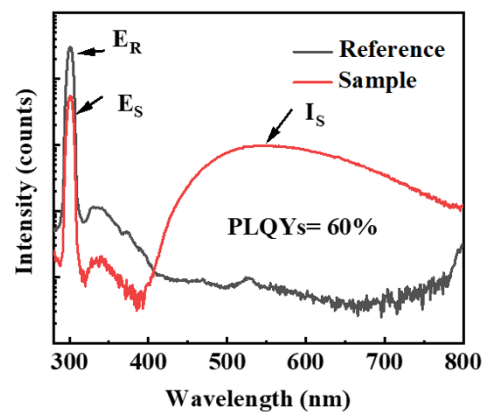

**Figure S9.** Excitation line of reference (300 nm) and emission spectrum of  $(DTA)_2Cu_2I_4$  crystal powder collected by an integrating sphere system. The PLQYs was calculated based on the equation:  $\eta_{QE} = I_S / (E_R - E_S)$ , which  $I_S$  represents the luminescence emission spectrum of the sample,  $E_R$  is the spectrum of the excitation light from the empty integrated and  $E_S$  is the excitation spectrum for exciting the sample.

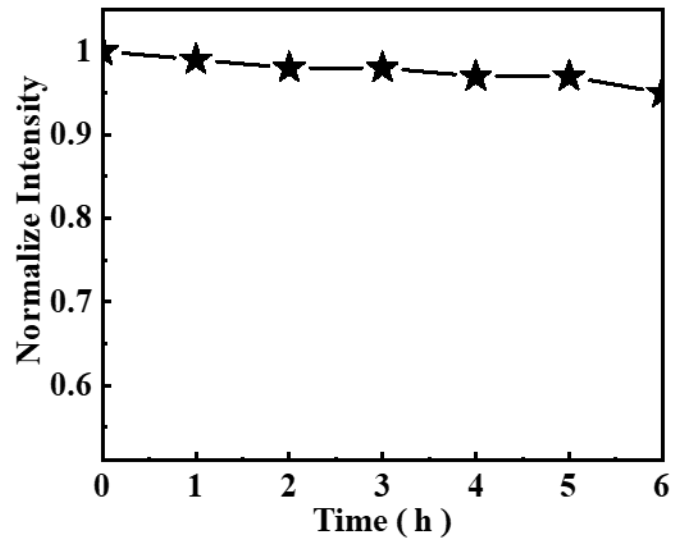

**Figure S10.** The PL intensities of cold-white phosphor exposing to UV light (302 nm) for 12 hours.

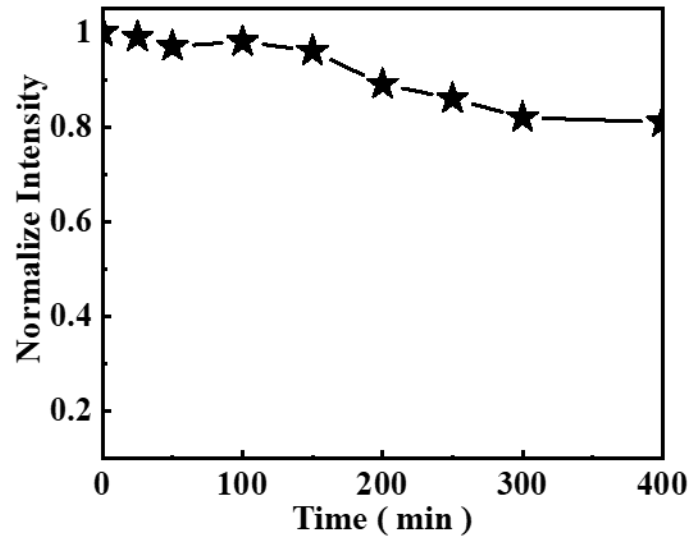

**Figure S11.** PL intensity of the WLED measured at different working time.



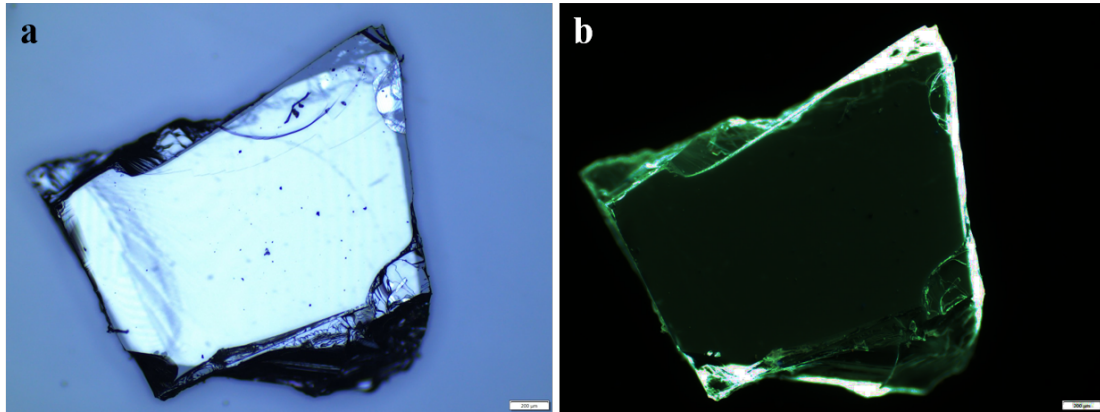

**Figure S12.** (a,b) The microscope and PL images of plate-like crystal (the scale bar is 200  $\mu\text{m}$ ).
